# Supplementary material for: Novel aggregation-induced emission-photosensitizers with built-in capability of mitochondria targeting and glutathione depletion for efficient photodynamic therapy
Source: Royal Society of Chemistry journal article supplement (doi:10.1039/d2nr06593b), 2023-01-01
Supplement: d2nr06593b1.pdf [file d2nr06593b1.pdf]

## Supplementary Information

### **Novel aggregation-induced emission (AIE)-photosensitizers with built-in capability of mitochondria targeting and glutathione depletion for efficient photodynamic therapy**

Sauraj<sup>a</sup>, Ji Hee Kang<sup>a</sup>, O Hyun Lee, Young Tag Ko<sup>\*a</sup>

<sup>a</sup> College of Pharmacy, Gachon Institute of Pharmaceutical Sciences, Gachon University, Incheon, Republic of Korea

\*Corresponding author:

Young Tag Ko

College of Pharmacy, Gachon Institute of Pharmaceutical Sciences, Gachon University, Incheon, Republic of Korea 21936

Tel.: +82-32-820-4923; fax:+ 82-32-820-4829

E-mail address: [youngtakko@gachon.ac.kr](mailto:youngtakko@gachon.ac.kr)

## Synthesis of TPEPy

TPE-Br (496 mg, 1 mmol) and 4-vinylpyridine (496 mg, 1 mmol) were dissolved in 10 ml dry DMF followed by the addition of (22 mg, 0.1 mmol) palladium (II) acetate, and (31mg, 0.1 mmol) tri (o-tolyl)phosphine. After that, the (0.8 ml) triethylamine was added to reaction mixture and stirred at 110°C temperature for 12 h under argon atmosphere. After cooling down the reaction mixture to room temperature the reaction was quenched by water (30 ml) and the mixture was extracted with ethyl acetate. The collected organic layer was washed by brine, dried over Na<sub>2</sub>SO<sub>4</sub> and concentrated under reduced pressure. The desired residue was purified by column chromatography using n-hexane/ethyl acetate (1/1~ 1/2, v/v) as eluent to give the desired product TPEPy as a yellow solid (316 mg, 63.7 %).

<sup>1</sup>H NMR (600 MHz, CDCl<sub>3</sub>) δ 8.55 (d, 2H), 7.32 (d, 2H), 7.29 (s, 1H), 7.27 (s, 1H), 7.23-7.19 (m, 1H), 7.14-7.09 (m, 3H), 7.05-7.03 (m, 4H), 6.98-6.91 (m, 5H), 6.69 - 6.61 (m, 4H), 3.75 (s, 3H), 3.74 (s, 3H). <sup>13</sup>C NMR (151 MHz, CDCl<sub>3</sub>) δ 158.4, 158.3, 150.2, 145.3, 145.0, 144.2, 141.0, 138.7, 136.4, 136.3, 133.9, 133.2, 132.8, 132.7, 132.0, 131.6, 127.9, 126.6, 126.4, 125.5, 120.9, 113.3, 55.2. LC-MS, m/z: [M+H]<sup>+</sup> calcd 496.2, found 496.2

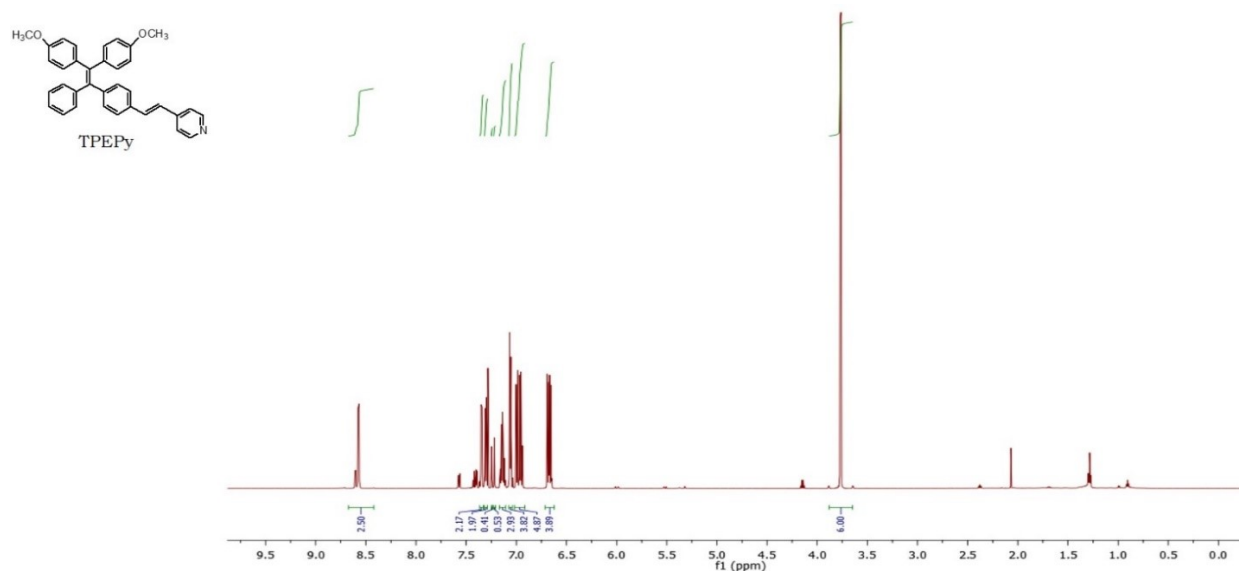

Fig. S1. (a) <sup>1</sup>H NMR spectrum of TPEPy

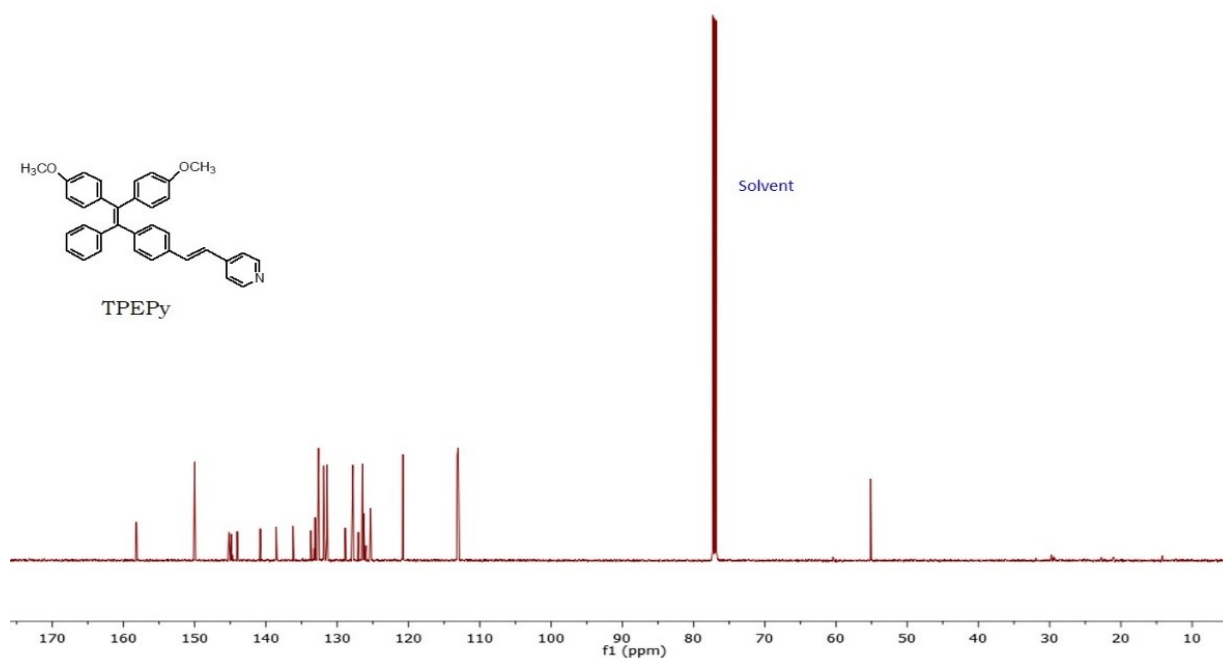

Fig. S2.  $^{13}\text{C}$  NMR spectrum of TPEPy

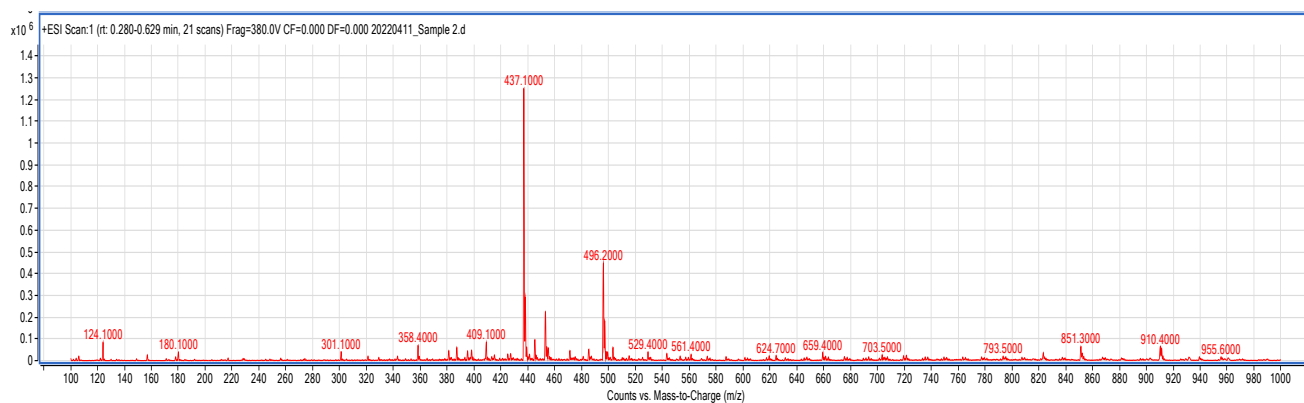

Fig. S3. LC-MS chromatograph of TPEPy in the positive mode of ionization (ESI+/[M+H]<sup>+</sup>)

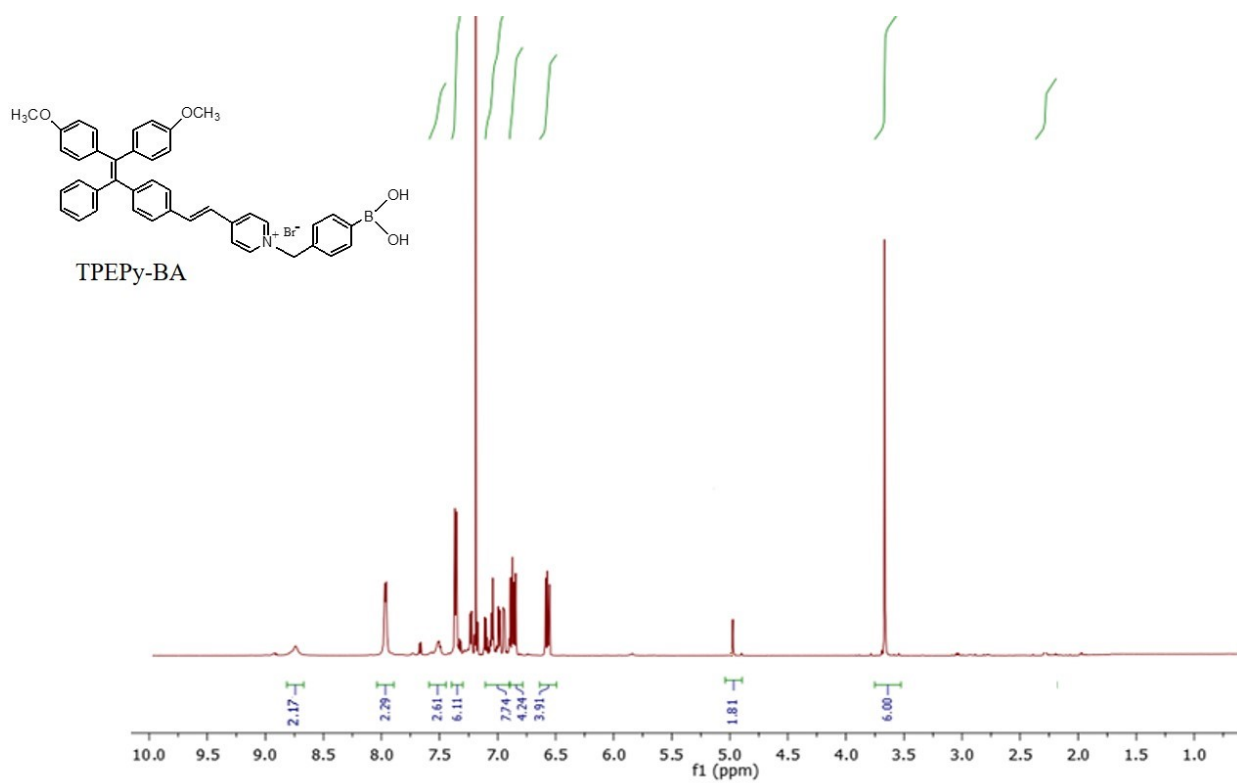

Fig. S4. <sup>1</sup>H NMR spectrum of TPEPy-BA

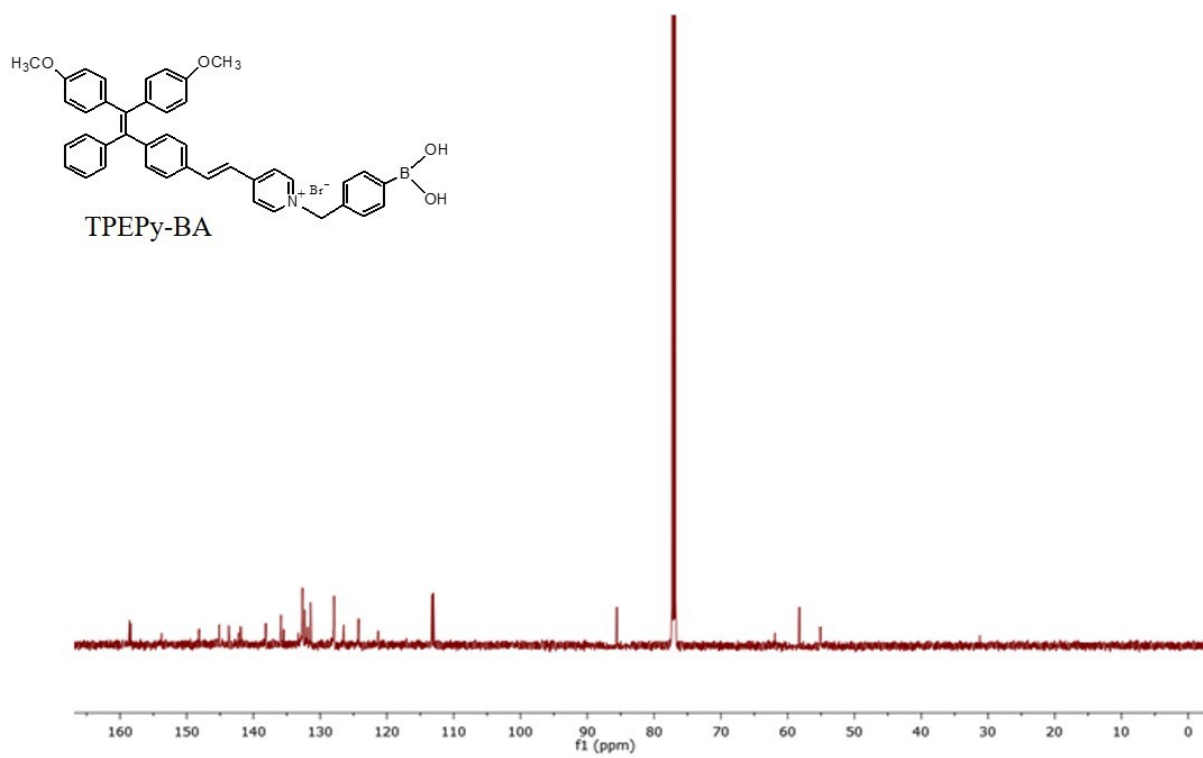

Fig. S5. <sup>13</sup>C NMR spectrum TPEPy-BA

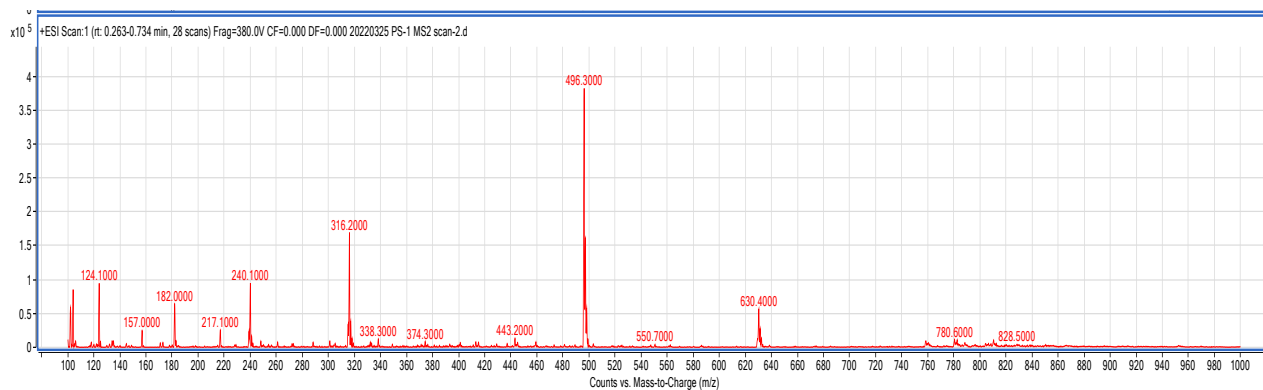

Fig. S6. LC-MS chromatogram of TPEPy-BA in in the positive mode of ionization (ESI+/[M+H]<sup>+</sup>)

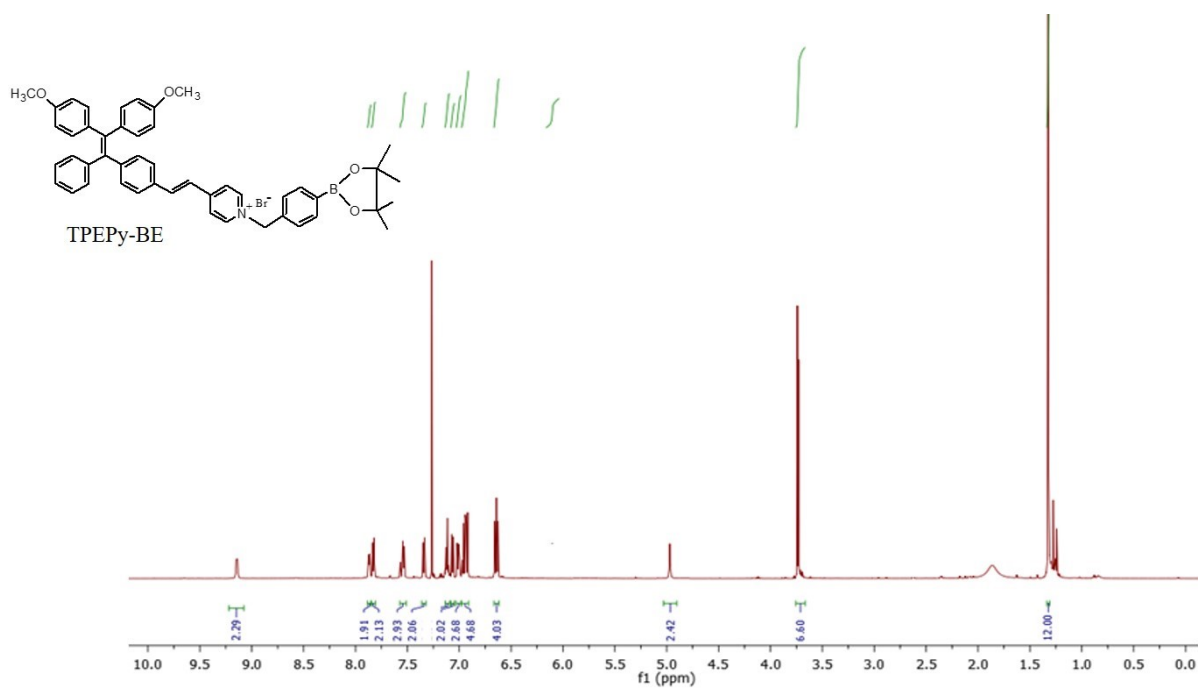

Fig. S7. <sup>1</sup>H NMR spectrum of TPEPy-BE

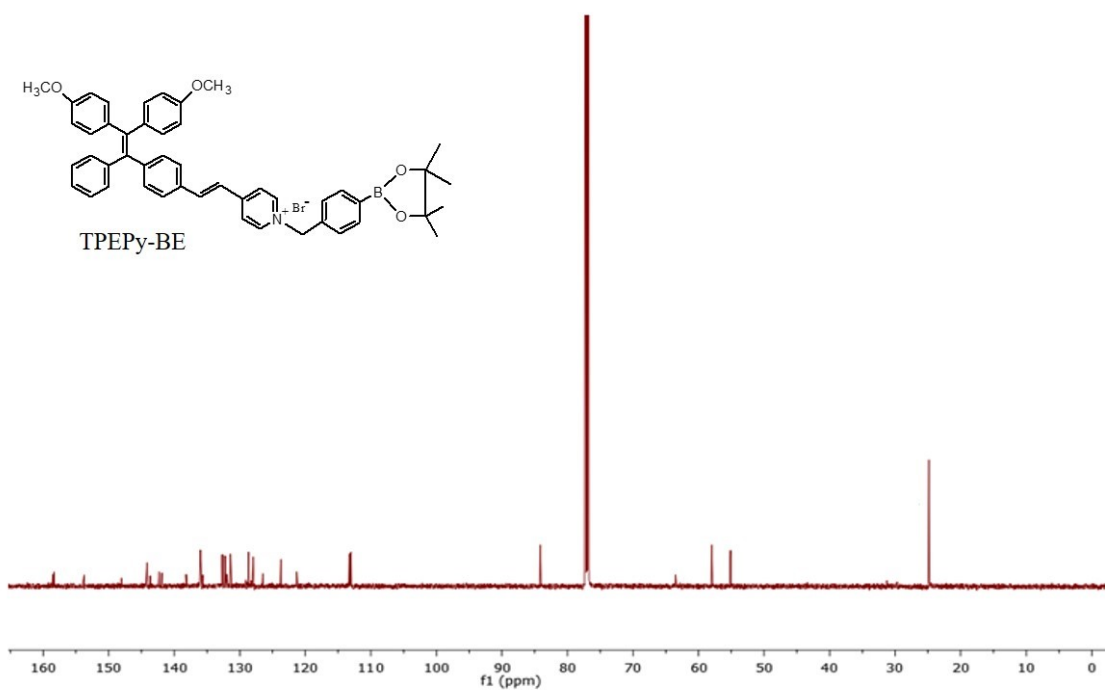

Fig. S8.  $^{13}\text{C}$  NMR spectrum of TPEPy-BE

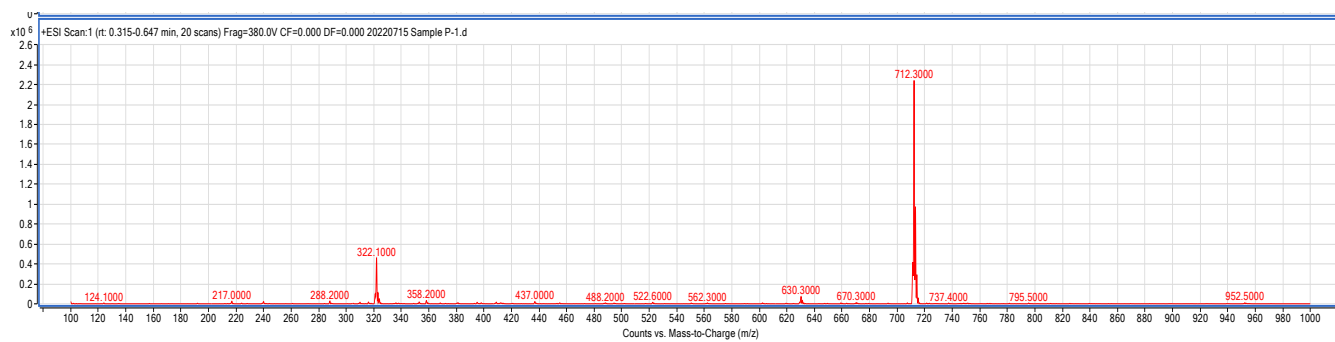

Fig. S9. LC-MS chromatograph of TPEPy-BE in the positive mode of ionization ( $\text{ESI}^+/\text{[M+H]}^+$ )

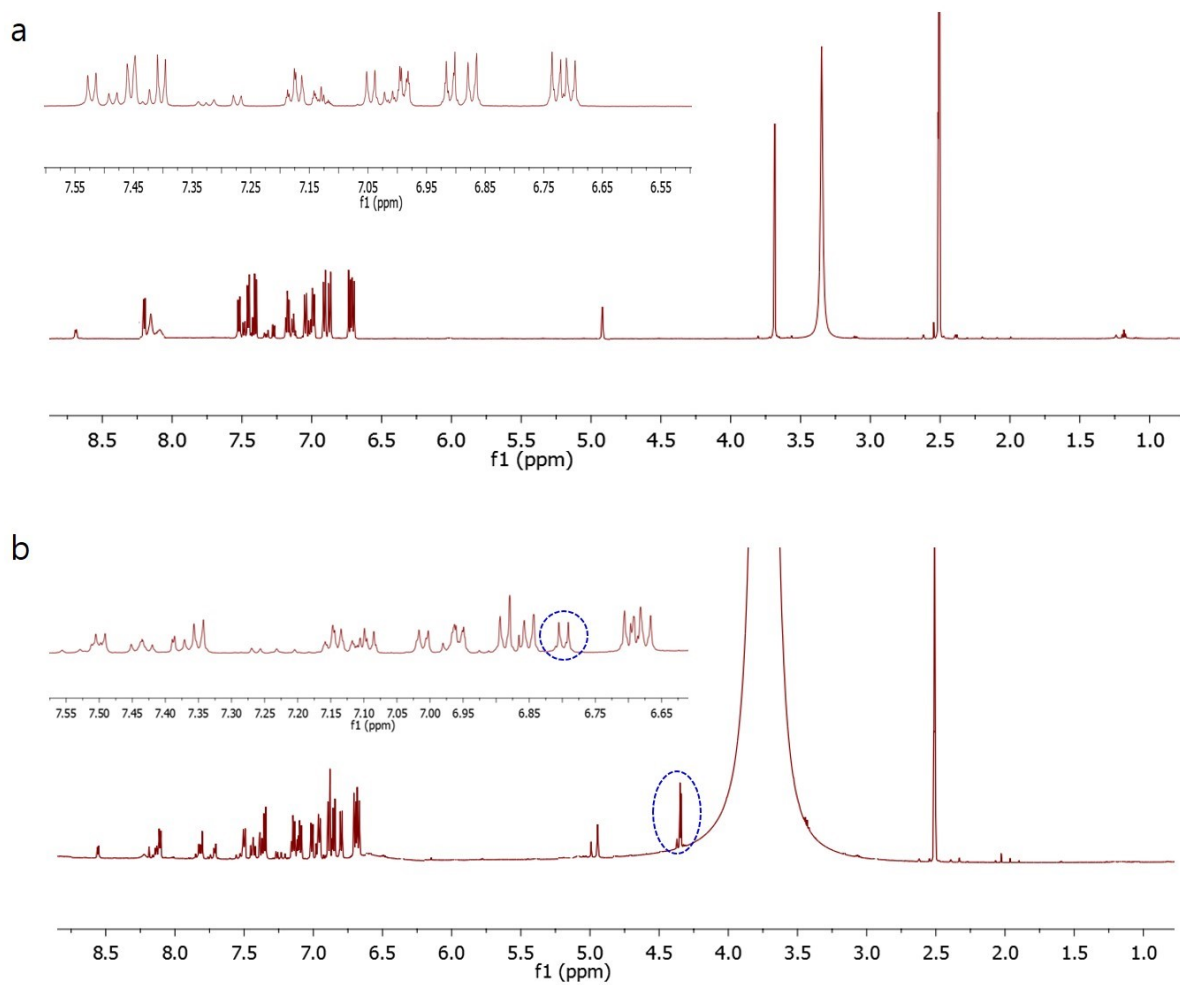

Fig. S10. (a)  $^1\text{H}$  NMR spectrum of TPEPy-BA before and after hydrolysis in presence of (100  $\mu\text{M}$ )  $\text{H}_2\text{O}_2$ .

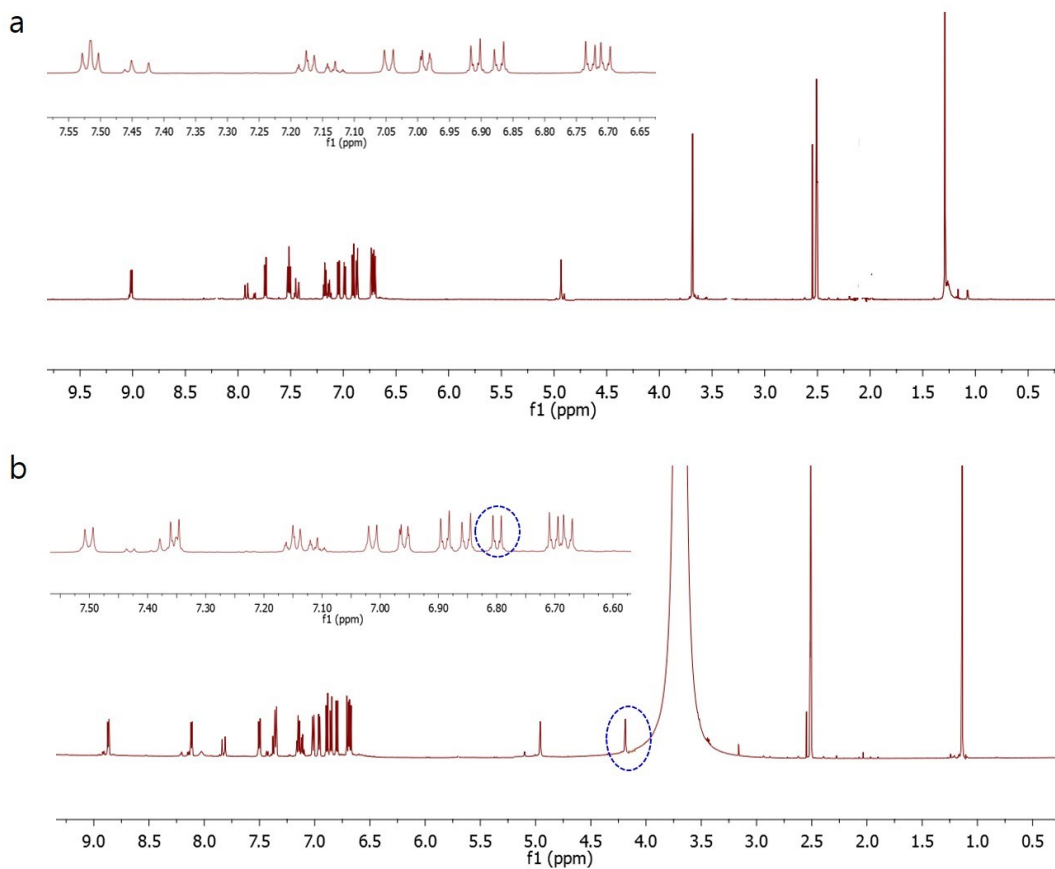

Fig. S11. (a)  $^1\text{H}$  NMR spectrum of TPEPy-BE before and after hydrolysis in presence of (100  $\mu\text{M}$ )  $\text{H}_2\text{O}_2$ .

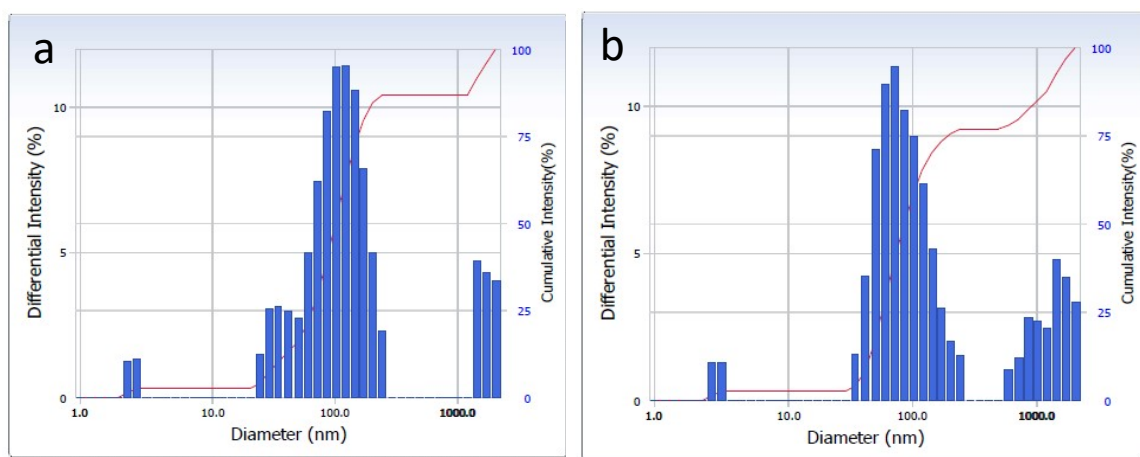

Fig. S12. (a) Average particle size of TPEPy-BA NPs, and (b) TPEPy-BE NPs in PBS (7.4).



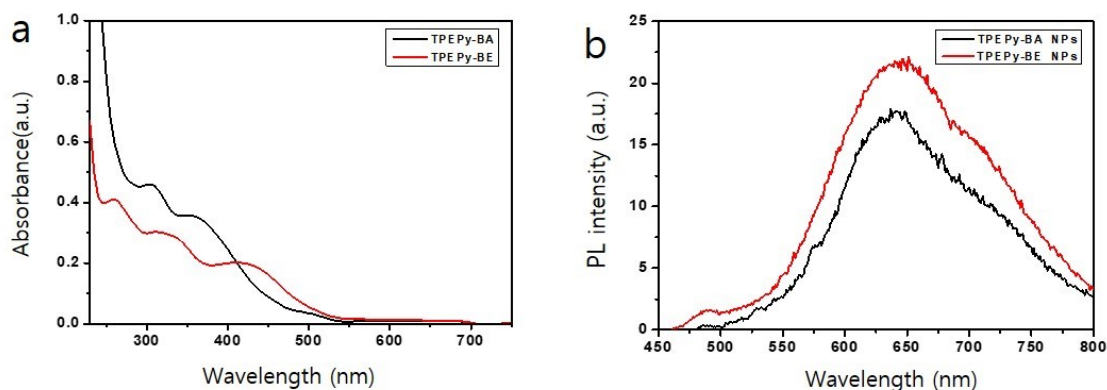

Fig. S13. (a) Absorbance spectra of TPEPy-BA NPs and TPEPy-BE NPs in PBS (7.4) and (b) Photoluminescence (PL) spectra of TPEPy-BA NPs and TPEPy-BE NPs in PBS (7.4).

Table S1. Characterization of AIE-PSs NPs

| Sample       | Size (nm) | PDI         | $\Phi F$ |
|--------------|-----------|-------------|----------|
| TPEPy-BA NPs | 108.3±42  | 0.311 ± 0.2 | 0.14     |
| TPEPy-BE NPs | 118.3±61  | 0.316 ± 0.1 | 0.17     |

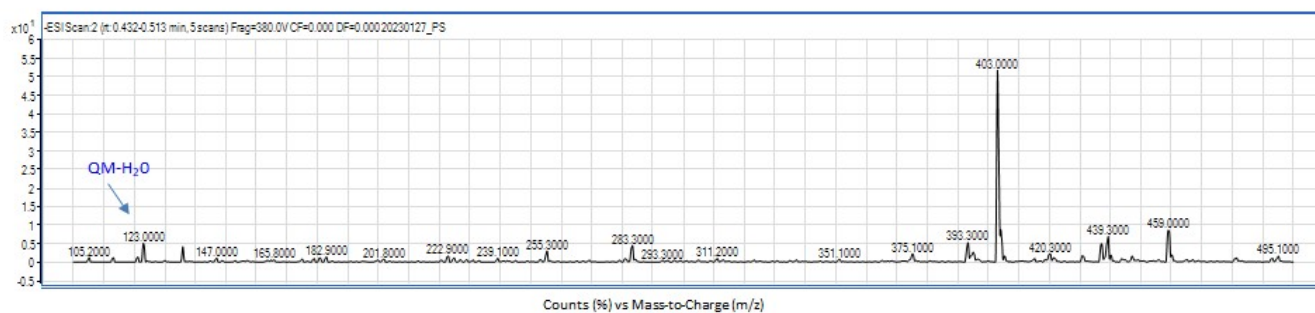

Fig. S14. LC-MS spectrum of TPEPy-BA treated with (100  $\mu$ M)  $H_2O_2$ . QM- $H_2O$  were products of nucleophilic addition between quinone methide and  $H_2O$ .

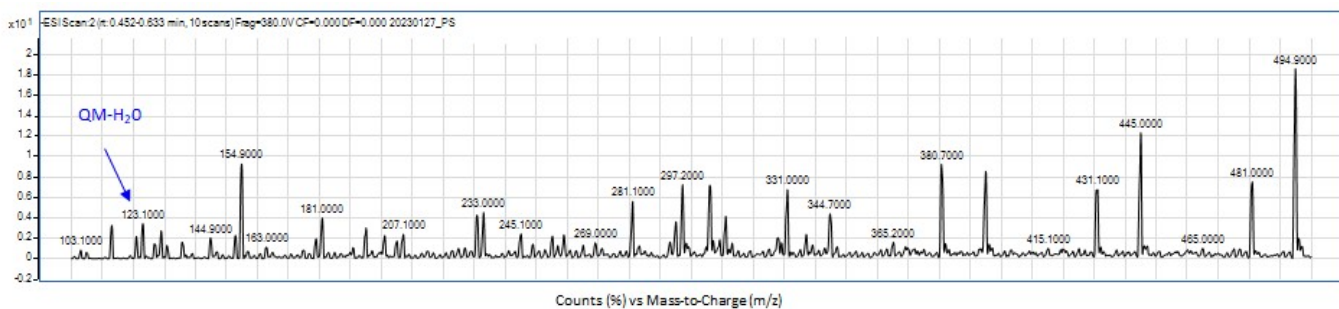

Fig. S15. LC-MS spectrum of TPEPy-BE treated with (100  $\mu\text{M}$ )  $\text{H}_2\text{O}_2$ . QM- $\text{H}_2\text{O}$  were products of nucleophilic addition between quinone methide and  $\text{H}_2\text{O}$ .

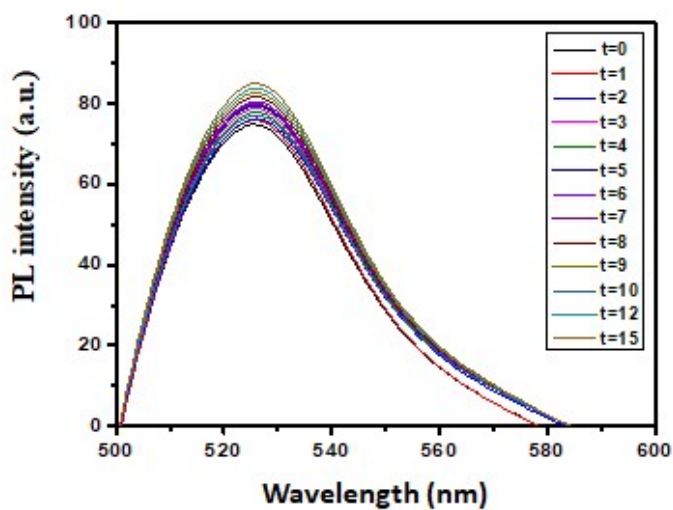

Fig. S16. Fluorescence spectrum of DHR123 irradiation with white light ( $200 \text{ mW/cm}^2$ ) for 15 min.
